# Supplementary material for: Effects of local and regional climatic fluctuations on dengue outbreaks in southern Taiwan
Source: PubMed Central journal article supplement (PMC5456348; doi:10.1371/journal.pone.0178698), 2017-06-02
Supplement: pone.0178698.s005.pdf [file pone.0178698.s005.pdf]

**S2 Table. Annual meteorological parameters in southern Taiwan from 1998 to 2015.**

| Year    | Meteorological parameters |      |              |      |              |      |             |       |       |      |
|---------|---------------------------|------|--------------|------|--------------|------|-------------|-------|-------|------|
|         | TMEAN                     | SD   | TMIN         | SD   | TMAX         | SD   | PREC        | SD    | RH    | SD   |
| 1998    | 25.45                     | 3.94 | 22.43        | 4.07 | 29.44        | 3.82 | 5.85        | 17.03 | 78.14 | 5.42 |
| 1999    | 24.70                     | 3.99 | 21.69        | 4.25 | 28.78        | 3.77 | 6.71        | 20.28 | 77.97 | 5.89 |
| 2000    | 24.76                     | 4.04 | 21.81        | 4.16 | 28.92        | 3.82 | 4.54        | 14.85 | 79.36 | 5.67 |
| 2001    | 24.83                     | 3.99 | 21.71        | 4.38 | 29.16        | 3.73 | 6.39        | 25.18 | 77.43 | 6.67 |
| 2002    | 25.28                     | 3.93 | 22.31        | 4.31 | 29.37        | 3.62 | 3.08        | 10.55 | 74.77 | 6.23 |
| 2003    | 25.12                     | 4.27 | 22.10        | 4.74 | 29.22        | 3.88 | 3.05        | 16.07 | 75.62 | 6.47 |
| 2004    | 24.92                     | 4.27 | 21.69        | 4.52 | <b>29.46</b> | 4.15 | 3.48        | 15.43 | 74.86 | 6.27 |
| 2005    | 24.82                     | 4.85 | 21.73        | 5.22 | 29.13        | 4.64 | <b>8.18</b> | 29.21 | 75.54 | 7.54 |
| 2006    | 25.34                     | 3.99 | 22.36        | 4.24 | 29.45        | 3.76 | 5.36        | 21.41 | 78.26 | 6.75 |
| 2007    | 25.21                     | 4.02 | 22.27        | 4.33 | 29.23        | 3.73 | 6.03        | 22.98 | 75.31 | 6.83 |
| 2008    | 24.85                     | 4.41 | 21.89        | 4.73 | 28.89        | 4.15 | 6.20        | 24.77 | 74.05 | 6.83 |
| 2009    | 25.10                     | 4.27 | 22.17        | 4.66 | 29.13        | 3.86 | 4.28        | 29.59 | 73.69 | 5.68 |
| 2010    | 25.05                     | 4.21 | 22.07        | 4.58 | 29.10        | 3.93 | 5.40        | 21.03 | 72.78 | 6.10 |
| 2011    | 24.48                     | 4.69 | 21.72        | 4.95 | 28.32        | 4.46 | 4.13        | 16.21 | 73.53 | 6.17 |
| 2012    | 24.91                     | 4.22 | 22.04        | 4.46 | 28.81        | 4.02 | 6.31        | 19.30 | 76.07 | 6.72 |
| 2013    | 25.05                     | 4.24 | 22.23        | 4.54 | 28.74        | 3.90 | 4.63        | 19.62 | 73.98 | 6.73 |
| 2014    | 25.13                     | 4.55 | 22.30        | 5.00 | 28.72        | 4.26 | 4.40        | 17.96 | 73.94 | 6.37 |
| 2015    | <b>25.55</b>              | 4.08 | <b>22.88</b> | 4.44 | 29.14        | 3.65 | 3.87        | 13.64 | 74.68 | 6.55 |
| Average | 25.03                     | 4.22 | 22.08        | 4.53 | 29.06        | 3.95 | 5.10        | 19.73 | 75.55 | 6.38 |

TMEAN=mean temperature, SD=standard deviation, TMIN=minimum temperature, TMAX=maximum temperature, PREC=precipitation, RH= relative humidity. The maximum value for each parameter is shown in bold.
